# Supplementary material for: Haplotypes of DNA repair and cell cycle control genes, X-ray exposure, and risk of childhood acute lymphoblastic leukemia
Source: Springer Nature journal article supplement (doi:10.1007/s10552-011-9848-y), 2011-10-10

## Supplemental Material

### Haplotypes of DNA repair and cell cycle control genes, x-ray exposure, and risk of childhood acute lymphoblastic leukemia

Anand P. Chokkalingam<sup>1\*</sup>, Karen Bartley<sup>1\*</sup>, Joseph L. Wiemels<sup>2</sup>, Catherine Metayer<sup>1</sup>, Lisa F. Barcellos<sup>1</sup>, Helen M. Hansen<sup>3</sup>, Melinda C. Aldrich<sup>4</sup>, Neela Guha<sup>5</sup>, Kevin Y. Urayama<sup>5</sup>, Ghislaine Scélo<sup>5</sup>, Jeffrey S. Chang<sup>6</sup>, Stacy R. Month<sup>7</sup>, John K. Wiencke<sup>3</sup>, Patricia A. Buffler<sup>1</sup>

<sup>1</sup> School of Public Health, University of California Berkeley, Berkeley, CA; <sup>2</sup> Department of Epidemiology and Biostatistics, University of California San Francisco, San Francisco, CA; <sup>3</sup> Department of Neurological Surgery, University of California San Francisco, San Francisco, CA; <sup>4</sup> Vanderbilt University Medical Center, Vanderbilt University, Nashville, TN; <sup>5</sup> International Agency for Research on Cancer, Lyon, France; <sup>6</sup> National Institute of Cancer Research, National Health Research Institutes, Tainan, Taiwan; <sup>7</sup> Kaiser Permanente Medical Group, Oakland, California

\*These authors contributed equally

Corresponding author:

Anand P. Chokkalingam  
Division of Epidemiology  
School of Public Health  
University of California, Berkeley  
1995 University Avenue, Suite 460  
Berkeley, CA 94704  
Phone: 510-642-8375  
Fax: 510-643-1735  
Email: anandc@berkeley.edu

**Supplementary Figure 1.** Significant ( $p \leq 0.05$ ) haplotype sliding window results for DNA repair and cell cycle control genes and childhood ALL. Outlined blocks show smallest multi-SNP p-values. These include a 3-SNP haplotype association for *ERCC2* ( $p=0.025$ ), a 3-SNP haplotype association for *RAD51* among Hispanics ( $p=0.034$ ), a 2-SNP haplotype association for *APEX1* among non-Hispanics ( $p=0.001$ ), and a 2-SNP haplotype association for *BRCA2* among non-Hispanics ( $p=0.006$ ). The risk estimates from haplotype trend regression of these are in Table 2.

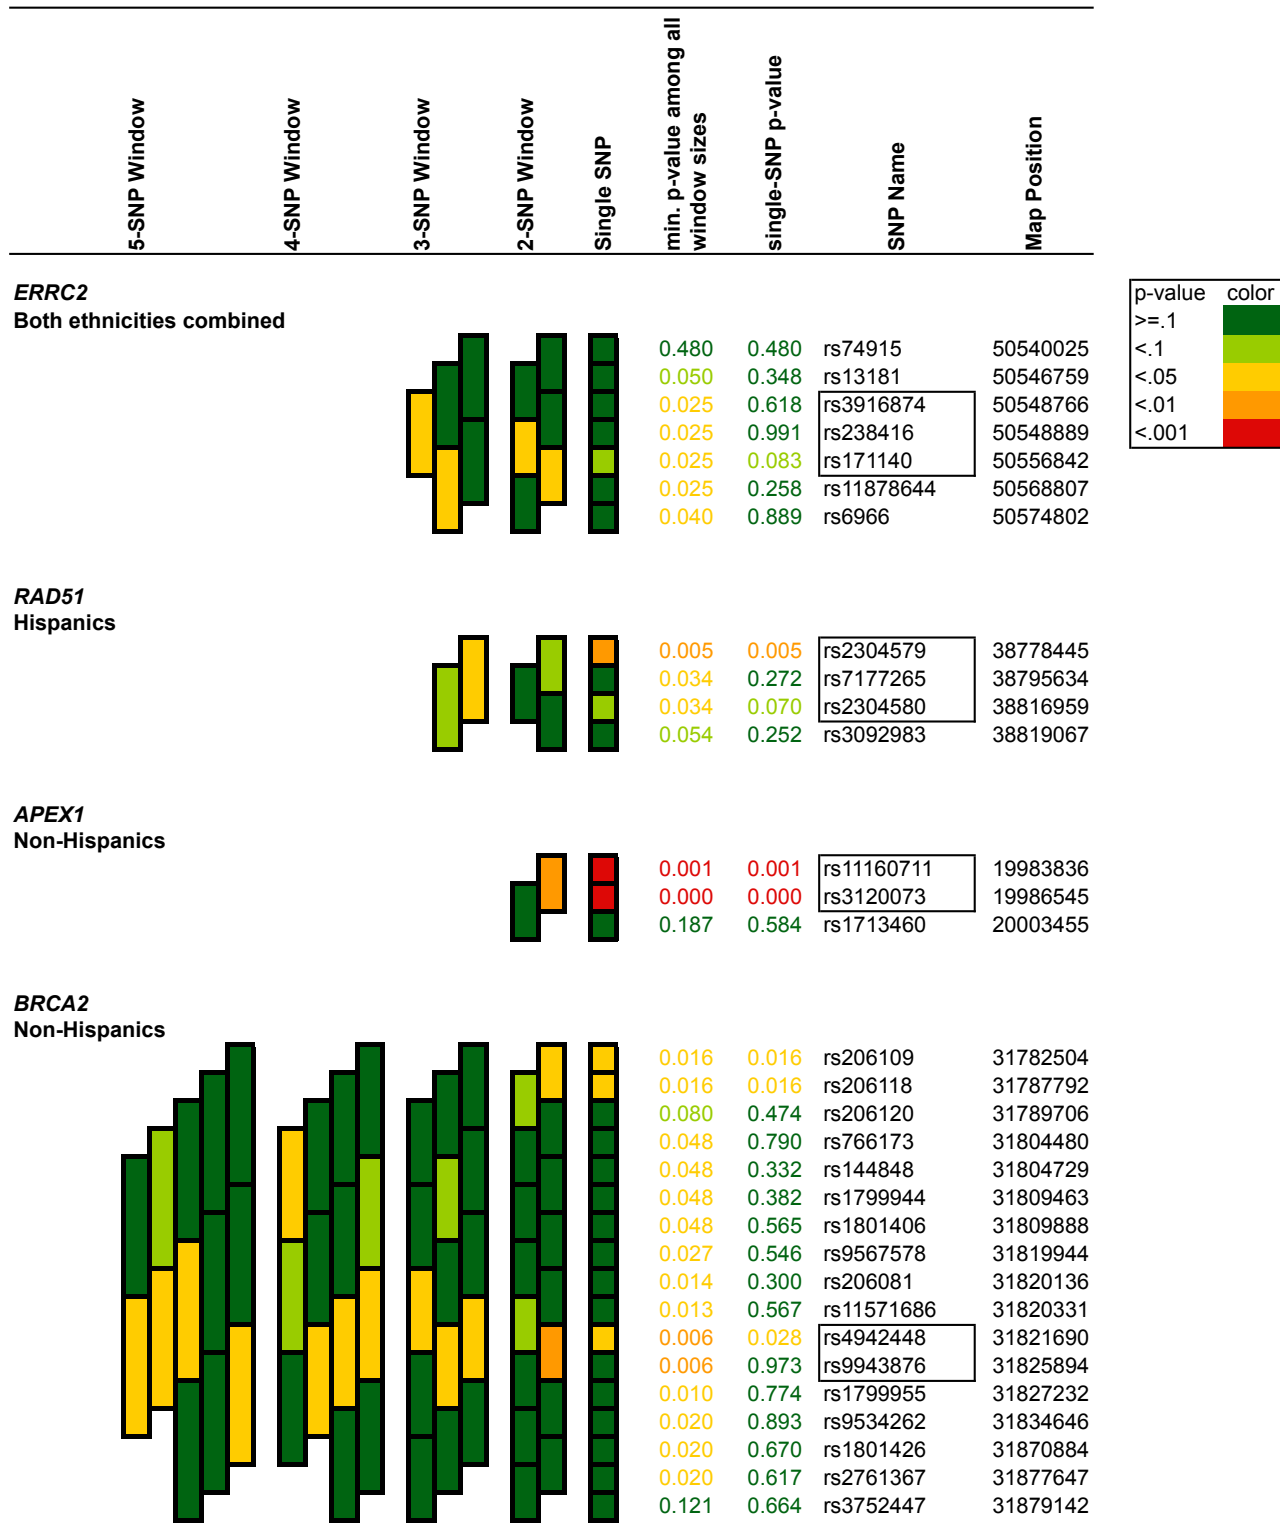

**Supplementary Figure 2.** Significant ( $p \leq 0.05$ ) haplotype sliding window results for DNA repair and cell cycle control genes and childhood ALL, by disease subtype. Outlined blocks show windows with the smallest multi-SNP p-values. These include: for  $t(12;21)$  translocation-positive ALL, a 6-SNP haplotype association for *NBN* ( $p=0.044$ ) and a 6-SNP haplotype association for *XRCC4* ( $p=0.007$ ); for any structural changes (including  $t(12;21)$  translocations), a 3-SNP haplotype association for *XRCC4* ( $p=0.011$ ); for high hyperdiploid ALL and ALL with any numerical ploidy changes, the same 2-SNP haplotype window for *CDKN2A* ( $p=0.003$  and  $0.001$ , respectively). Risk estimates from haplotype trend regression of these are in Table 3.

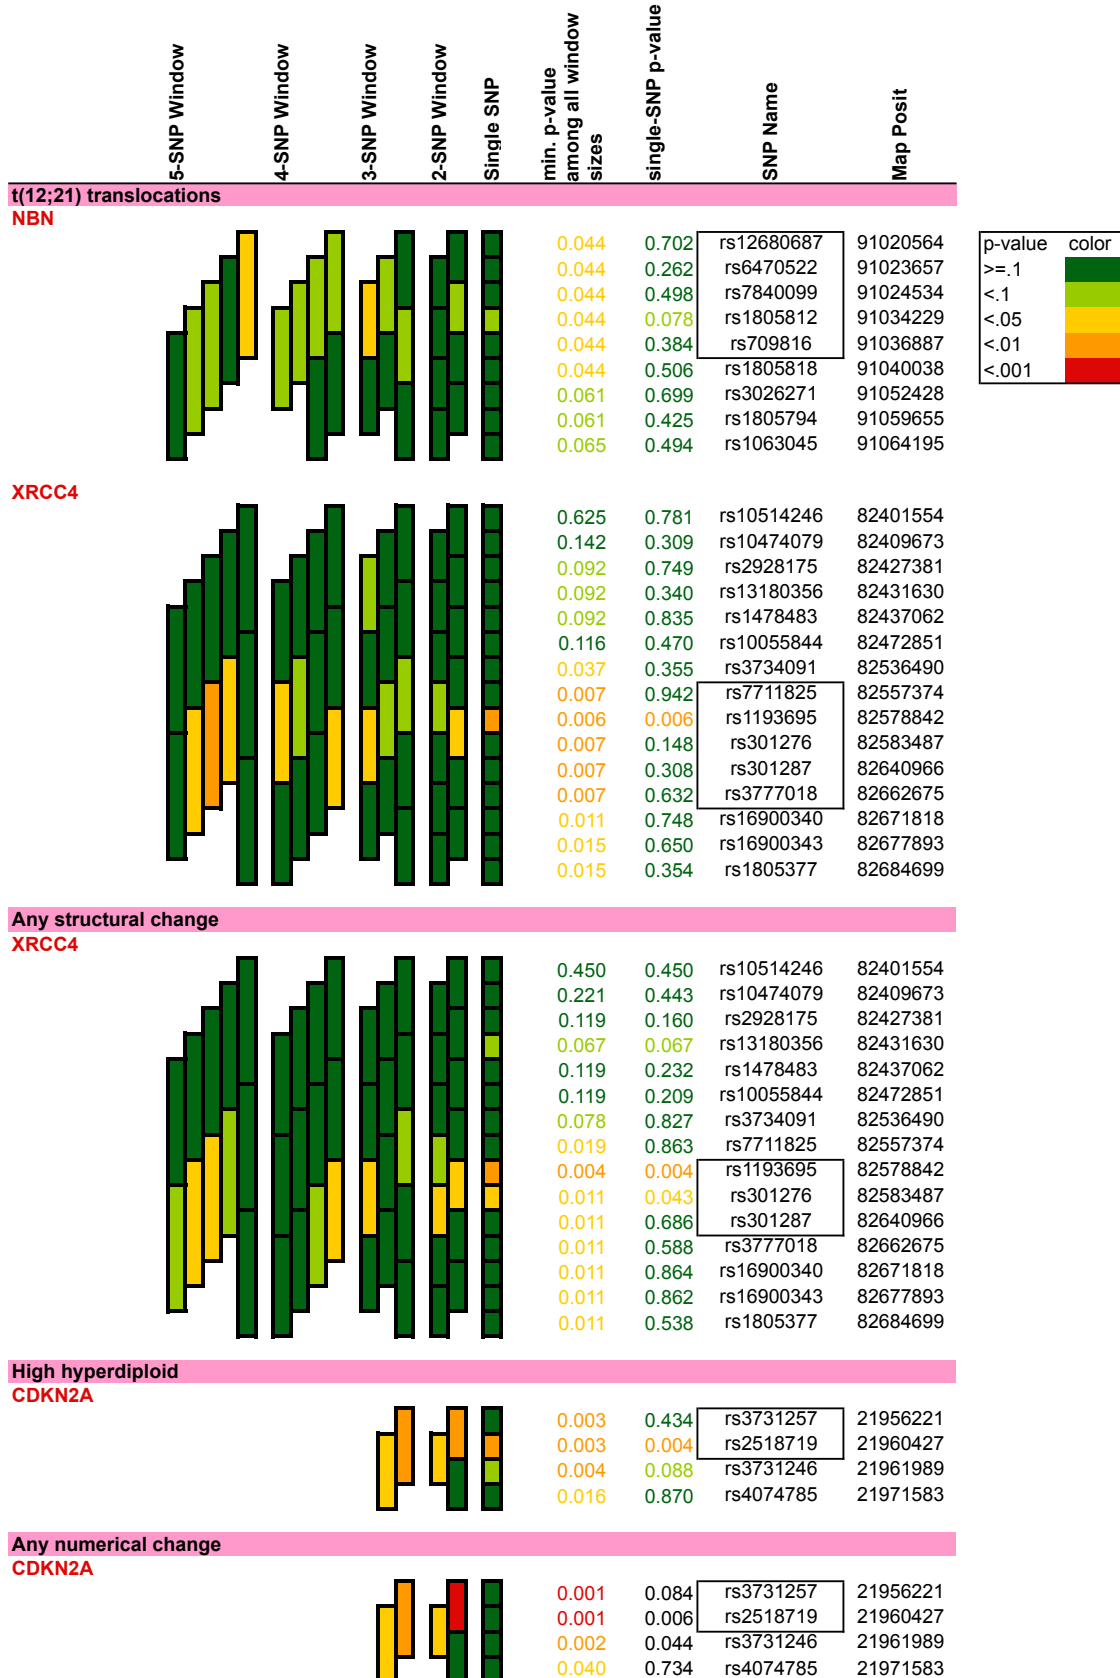

Supplement: MOESM1 [file 8850516]
